# Supplementary material for: Enzyme and pH dual responsive linear-dendritic block copolymer micelles based on a phenylalanyl–lysine motif and peripherally ketal-functionalized dendron as potential drug carriers
Source: Royal Society of Chemistry journal article supplement (doi:10.1039/d3ra03790h), 2023-01-01
Supplement: d3ra03790h1.pdf [file d3ra03790h1.pdf]

**Enzyme and pH dual responsive linear-dendritic block  
copolymer micelles based on a phenylalanyl-lysine motif  
and peripherally ketal-functionalized dendron as potential  
drug carriers**

Yujia Wang,<sup>‡</sup> Wenjie Song,<sup>‡</sup><sup>1</sup> Lijun Bao, Junwu Wei,

Yangyang Qian, Yunmei Bi\*

*College of Chemistry and Chemical Engineering, Yunnan Normal University,*

*Kunming 650092, P.R. China*

---

<sup>1</sup> <sup>‡</sup> These authors contributed equally to this work.

\*E-mail: [yunmeibi@hotmail.com](mailto:yunmeibi@hotmail.com)

## Spectroscopic Characterization

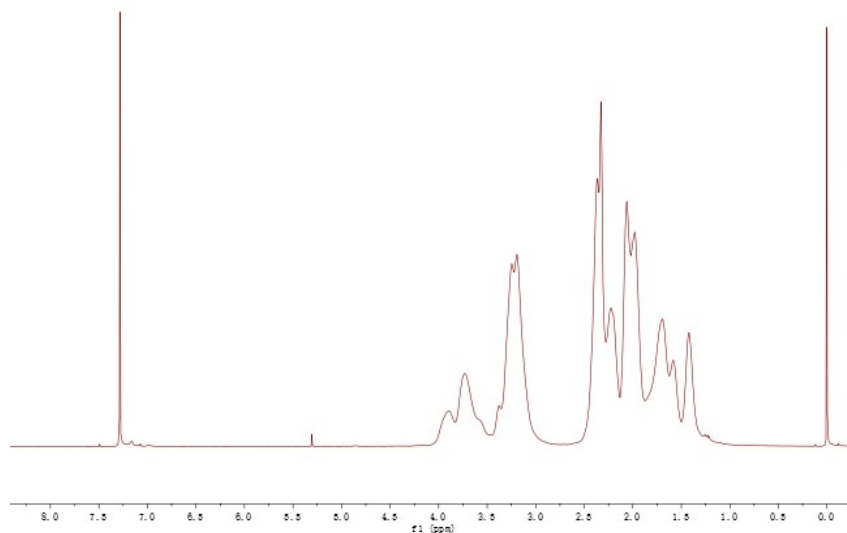

**Fig. S1** <sup>1</sup>H NMR spectrum of PNVP-Phe-Lys-*b*-G<sub>1</sub> in CDCl<sub>3</sub>.

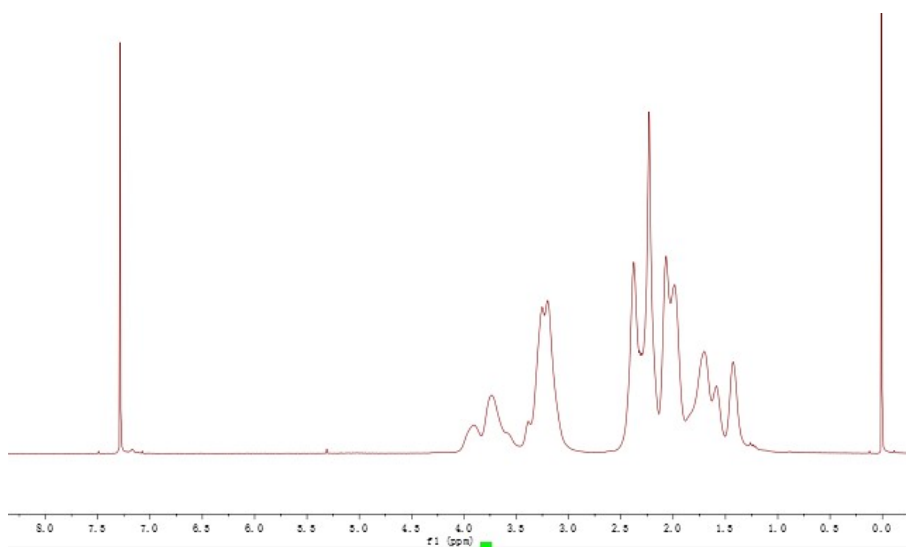

**Fig. S2** <sup>1</sup>H NMR spectrum of PNVP-Phe-Lys-*b*-G<sub>2</sub> in CDCl<sub>3</sub>.

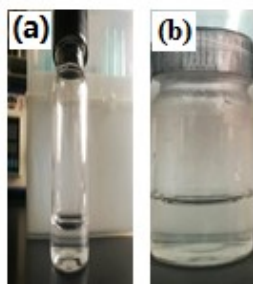

**Fig. S3** PNVP-Phe-Lys-*b*-G<sub>3</sub> micelle solutions before and after the incubation with trypsin solution (75  $\mu$ M) in 37  $^{\circ}$ C for 48 h.

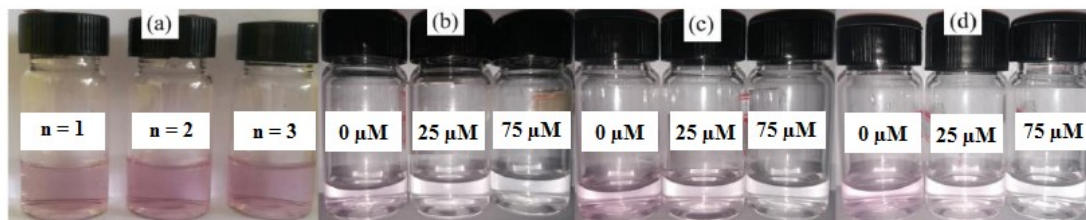

**Fig. S4** Nile red loaded PNVP-Phe-Lys-*b*-G<sub>n</sub> (n=1-3) micelle solutions (a) and after the incubation with different concentrations of trypsin (0  $\mu$ M, 25  $\mu$ M, 75  $\mu$ M) at 37  $^{\circ}$ C for 48 h ((b) for PNVP-Phe-Lys-*b*-G<sub>1</sub>, (c) for PNVP-Phe-Lys-*b*-G<sub>2</sub>, (d) for PNVP-Phe-Lys-*b*-G<sub>3</sub>).

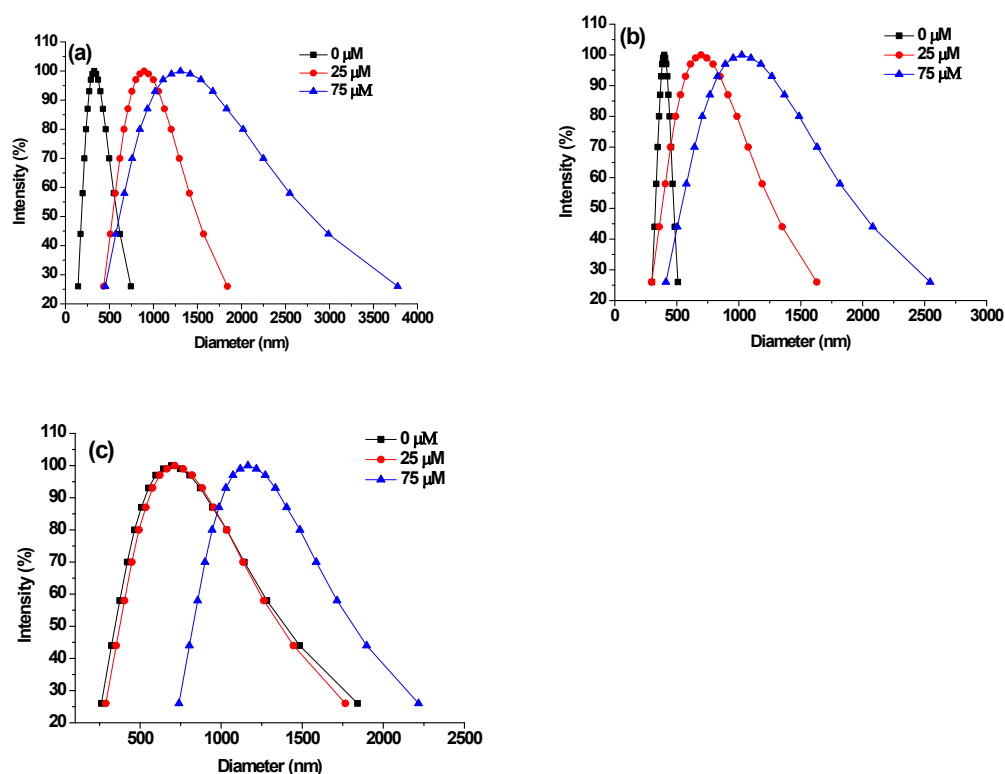

**Fig. S5** The particle size of Nile red loaded micelles formed by PNVP-Phe-Lys-*b*-G<sub>1</sub> (a), PNVP-Phe-Lys-*b*-G<sub>2</sub> (b) and PNVP-Phe-Lys-*b*-G<sub>3</sub> (c) after the incubation with different concentrations of trypsin (0  $\mu$ M, 25  $\mu$ M and 75  $\mu$ M).

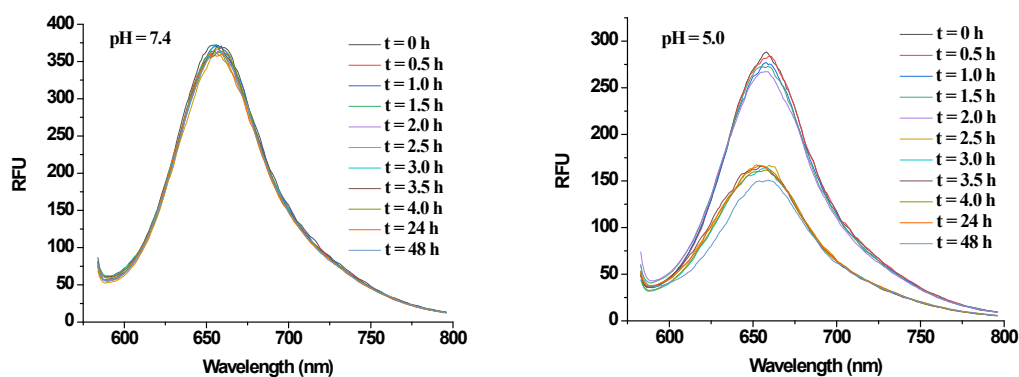

Fig. S6 Fluorescence spectra of Nile red in PNVP-Phe-Lys-*b*-G<sub>1</sub> micelles at pH 7.4 and pH 5.0.

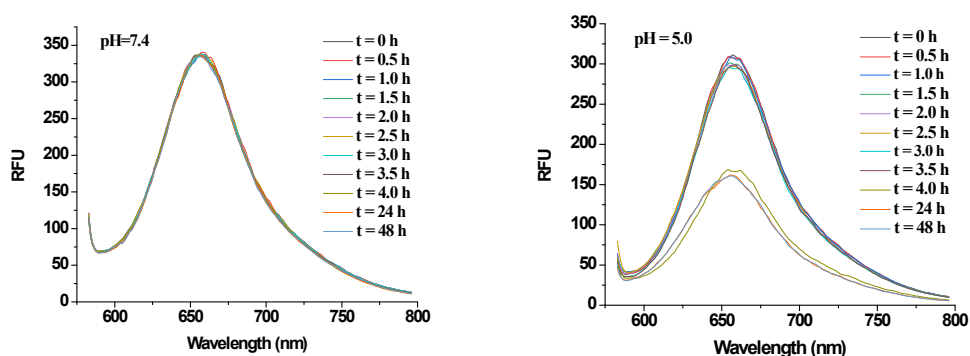

Fig. S7 Fluorescence spectra of Nile red in PNVP-Phe-Lys-*b*-G<sub>2</sub> micelles at pH 7.4 and pH 5.0.

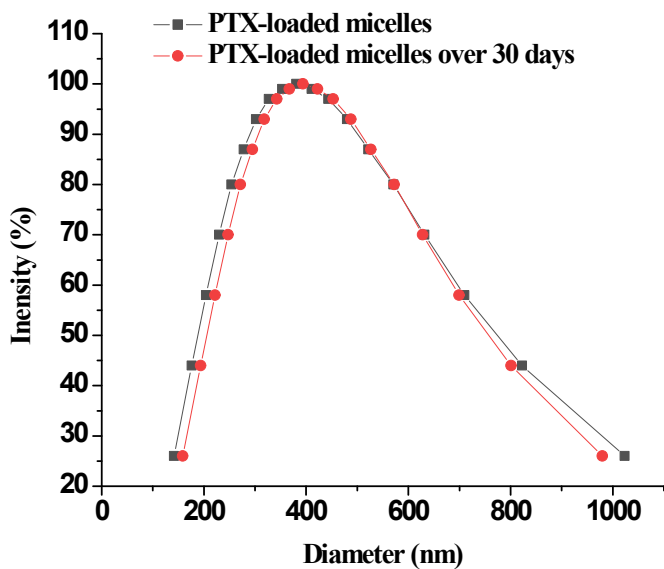

Fig. S8 The particle size of PTX-loaded micelles formed by PNVP-Phe-Lys-*b*-G<sub>3</sub>.
